# Supplementary material
Source: ML conference proceedings conference paper supplement (https://proceedings.neurips.cc/paper_files/paper/2021/hash/8710ef761bbb29a6f9d12e4ef8e4379c-Abstract.html)
Supplement: Supplementary file 1 [file 8710ef761bbb29a6f9d12e4ef8e4379c-Supplemental.pdf]

## A Proofs

**Lemma 3.1.** *Let  $X_{\perp Z}^{\perp}$  be a  $X$ -measurable random variable such that, for all measurable functions  $f$ , we have that  $f$  is counterfactually invariant if and only if  $f(X)$  is  $X_{\perp Z}^{\perp}$ -measurable. If  $Z$  is discrete<sup>3</sup> then such a  $X_{\perp Z}^{\perp}$  exists.*

*Proof.* Write  $\{X(z)\}_z$  for the potential outcomes. First notice that if  $f(X)$  is  $\{X(z)\}_z$ -measurable then  $f(X)$  is counterfactually invariant. This is essentially by definition—intervention on  $Z$  doesn't change the potential outcomes, so it doesn't change the value of  $f(X)$ . Conversely, if  $f$  is counterfactually invariant, then  $f(X)$  is  $\{X(z)\}_z$ -measurable. To see this, notice that  $X = \sum_z 1[Z = z]X(z)$  is determined by  $Z$  and  $\{X(z)\}_z$ , so  $f(X) = \tilde{f}(Z, \{X(z)\}_z)$  for  $\tilde{f}(z, \{x(z)\}_z) = f(\sum_z 1[z' = z]x(z))$ . Now, if  $\tilde{f}$  depends only on  $\{X(z)\}_z$  we're done. So suppose that there is  $z, z'$  such that  $\tilde{f}(z, \{X(z)\}_z) \neq \tilde{f}(z', \{X(z)\}_z)$  (almost everywhere). But then  $f(X(z)) \neq f(X(z'))$ , contradicting counterfactual invariance.

Now, define  $\mathcal{F}_{X_{\perp Z}^{\perp}} = \sigma(X) \wedge \sigma(\{X(z)\}_z)$  as the intersection of sigma algebra of  $X$  and the sigma algebra of the potential outcomes  $\{X(z)\}_z$ . Because  $\mathcal{F}_{X_{\perp Z}^{\perp}}$  is the intersection of sigma algebras, it is itself a sigma algebra. Because every  $\mathcal{F}_{X_{\perp Z}^{\perp}}$ -measurable random variable is  $\{X(z)\}_z$ -measurable, we have that  $Z$  is not a cause of any  $\mathcal{F}_{X_{\perp Z}^{\perp}}$ -measurable random variable (i.e., there is no arrow from  $Z$  to  $X_{\perp Z}^{\perp}$ ). Because, for  $f$  counterfactually invariant,  $f(X)$  is both  $X$ -measurable and  $\{X(z)\}_z$ -measurable, it is also  $\mathcal{F}_{X_{\perp Z}^{\perp}}$ -measurable.  $\mathcal{F}_{X_{\perp Z}^{\perp}}$  is countably generated, as  $\{X(z)\}_z$  and  $X$  are both Borel measurable. Therefore, we can take  $X_{\perp Z}^{\perp}$  to be any random variable such that  $\sigma(X_{\perp Z}^{\perp}) = \mathcal{F}_{X_{\perp Z}^{\perp}}$ .  $\square$

**Theorem 3.2.** *If  $f$  is a counterfactually invariant predictor:*

1. *Under the anti-causal graph,  $f(X) \perp\!\!\!\perp Z \mid Y$ .*
2. *Under the causal-direction graph, if  $Y$  and  $Z$  are not subject to selection (but possibly confounded),  $f(X) \perp\!\!\!\perp Z$ .*
3. *Under the causal-direction graph, if the association is purely spurious,  $Y \perp\!\!\!\perp X \mid X_{\perp Z}^{\perp}, Z$ , and  $Y$  and  $Z$  are not confounded (but possibly selected),  $f(X) \perp\!\!\!\perp Z \mid Y$ .*

*Proof.* Reading  $d$ -separation from the causal graphs, we have  $X_{\perp Z}^{\perp} \perp\!\!\!\perp Z$  in the causal-direction graph when  $Y$  and  $Z$  are not selected on, and  $X_{\perp Z}^{\perp} \perp\!\!\!\perp Z \mid Y$  for the other cases. By assumption,  $f$  is a counterfactually-invariant predictor, which means that  $f$  is  $X_{\perp Z}^{\perp}$ -measurable.  $\square$

**Theorem 4.2.** *Let  $\mathcal{F}^{\text{invar}}$  be the set of all counterfactually invariant predictors. Let  $L$  be either square error or cross entropy loss. And, let  $f^* := \operatorname{argmin}_{f \in \mathcal{F}^{\text{invar}}} \mathbb{E}_P[L(Y, f(X))]$  be the counterfactually invariant risk minimizer. Suppose that the target distribution  $Q$  is causally compatible with the training distribution  $P$ . Suppose that any of the following conditions hold:*

1. *the data obeys the anti-causal graph*
2. *the data obeys the causal-direction graph, there is no confounding (but possibly selection), and the association is purely spurious,  $Y \perp\!\!\!\perp X \mid X_{\perp Z}^{\perp}, Z$ , or*
3. *the data obeys the causal-direction graph, there is no selection (but possibly confounding), the association is purely spurious and the causal effect of  $X_{\perp Z}^{\perp}$  on  $Y$  is additive, i.e., the true data generating process is*

$$Y \leftarrow g(X_{\perp Z}^{\perp}) + \tilde{g}(U) + \xi \text{ where } \mathbb{E}[\xi \mid X_{\perp Z}^{\perp}] = 0, \quad (4.1)$$

*for some functions  $g, \tilde{g}$ .*

*Then, the training domain counterfactually invariant risk minimizer is also the target domain counterfactually invariant risk minimizer;  $f^* = \operatorname{argmin}_{f \in \mathcal{F}^{\text{invar}}} \mathbb{E}_Q[L(Y, f(X))]$ .*

<sup>3</sup>In fact, it suffices that all potential outcomes  $\{Y(z)\}_z$  are jointly measurable with respect to a single well-behaved sigma algebra; discrete  $Z$  is sufficient but not necessary.

*Proof.* First, since counterfactual invariance implies  $X_Z^\perp$ -measurable,

$$\operatorname{argmin}_{f \in \mathcal{F}^{\text{invar}}} \mathbb{E}_P[L(Y, f(X))] = \operatorname{argmin}_f \mathbb{E}_P[L(Y, f(X_Z^\perp))]. \quad (\text{A.1})$$

It is well-known that under squared error or cross entropy loss the minimizer is  $f^*(x_Z^\perp) = \mathbb{E}_P[Y | x_Z^\perp]$ . By the same argument, the counterfactually invariant risk minimizer in the target domain is  $\mathbb{E}_Q[Y | x_Z^\perp]$ . Thus, our task is to show  $\mathbb{E}_P[Y | x_Z^\perp] = \mathbb{E}_Q[Y | x_Z^\perp]$ .

We begin with the anti-causal case. We have that  $P(Y | X_Z^\perp) = P(X_Z^\perp | Y)P(Y) / \int P(X_Z^\perp | Y) dP(Y)$ . By assumption,  $P(Y) = Q(Y)$ . So, it suffices to show that  $P(X_Z^\perp | Y) = Q(X_Z^\perp | Y)$ . To that end, from the anti-causal direction graph we have that  $X_Z^\perp \perp\!\!\!\perp S, U | Y$ . Then,

$$P(X_Z^\perp | Y) = \int P(X_Z^\perp | Y, U, S = 1) d\tilde{P}(U) \quad (\text{A.2})$$

$$= \int P(X_Z^\perp | Y, U, \tilde{S} = 1) d\tilde{Q}(U) \quad (\text{A.3})$$

$$= Q(X_Z^\perp | Y), \quad (\text{A.4})$$

where the first and third lines are causal compatibility, and the second line is from  $X_Z^\perp \perp\!\!\!\perp S, \tilde{S}, U | Y$ .

The causal-direction case with no confounding follows essentially the same argument.

For the causal-direction case without selection,

$$\mathbb{E}_P[Y | X_Z^\perp] = g(X_Z^\perp) + \mathbb{E}_P[\tilde{g}(U) | X_Z^\perp] + \mathbb{E}_P[\xi | X_Z^\perp] \quad (\text{A.5})$$

$$= g(X_Z^\perp) + \mathbb{E}_P[\tilde{g}(U)] + 0. \quad (\text{A.6})$$

The first line is the assumed additivity. The second line follows because  $\mathbb{E}_P[\xi | X_Z^\perp] = 0$  for all causally compatible distributions ( $P(\xi, X_Z^\perp)$  doesn't change), and  $U \perp\!\!\!\perp X_Z^\perp$ . Taking an expectation over  $X_Z^\perp$ , we have  $\mathbb{E}_P[Y] = \mathbb{E}_P[g(X_Z^\perp)] + \mathbb{E}_P[\tilde{g}(U)]$ . By the same token,  $\mathbb{E}_Q[Y] = \mathbb{E}_Q[g(X_Z^\perp)] + \mathbb{E}_Q[\tilde{g}(U)]$ . But,  $\mathbb{E}_P[g(X_Z^\perp)] = \mathbb{E}_Q[g(X_Z^\perp)]$ , since changes to the confounder don't change the distribution of  $X_Z^\perp$  (that is,  $X_Z^\perp \perp\!\!\!\perp U$ ). And, by assumption,  $\mathbb{E}_Q[Y] = \mathbb{E}_P[Y]$ . Together, these imply that  $\mathbb{E}_P[\tilde{g}(U)] = \mathbb{E}_Q[\tilde{g}(U)]$ . Whence, from (A.6), we have  $\mathbb{E}_P[Y | X_Z^\perp] = \mathbb{E}_Q[Y | X_Z^\perp]$ , as required.  $\square$

**Theorem 4.4.** *The counterfactually invariant risk minimizer is not  $Q$ -minimax in general. However, under the conditions of Theorem 4.2, if the association is purely spurious,  $X_{Y \wedge Z} \perp\!\!\!\perp Y | X_Z^\perp, Z$ , and  $P(Z, Y)$  satisfies overlap, then the two predictors are the same. By overlap we mean that  $P(Z, Y)$  is a discrete distribution such that for all  $(z, y)$ , if  $P(z, y) > 0$  then there is some  $y' \neq y$  such that also  $P(z, y') > 0$ .*

*Proof.* The reason that the predictors are not the same in general is that the counterfactually invariant predictor will always exclude information in  $X_{Y \wedge Z}$ , even when this information is helpful for predicting  $Y$  in all target settings. For example, consider the case where  $Y, Z$  are binary,  $X = X_{Y \wedge Z}$  and, in the anti-causal direction,  $X_{Y \wedge Z} = \text{AND}(Y, Z)$ . With cross-entropy loss, the counterfactually invariant predictor is just the constant  $\mathbb{E}[Y]$ , but the decision rule that uses  $f(X) = 1$  if  $X = 1$  is always better. In the causal case, consider  $X_{Y \wedge Z} = Z$  and  $Y = X_{Y \wedge Z}$ .

Informally, the second claim follows because—in the absence of  $X_{Y \wedge Z}$  information—any predictor  $f$  that's better than the counterfactually invariant predictor when  $Y$  and  $Z$  are positively correlated will be worse when  $Y$  and  $Z$  are negatively correlated.

To formalize this, we begin by considering the case where  $Y$  is binary and  $X = X_Y^\perp$ . So, in particular, the counterfactually invariant predictor is just some constant  $c$ . Let  $f$  be any predictor that uses the information in  $X_Y^\perp$ . Our goal is to show that  $\mathbb{E}_Q[L(f(X_Y^\perp), Y)] > \mathbb{E}_Q[L(c, Y)]$  for at least one test distribution (so that  $f$  is not minimax). To that end, let  $P$  be any distribution where  $f(X_Y^\perp)$  has lower risk than  $c$  (this must exist, or we're done). Then, define  $A = \{(z, y) : \mathbb{E}_P[L(f(X_Y^\perp), y) | z] < L(c, y)\}$ . In words:  $A$  is the collection of  $z, y$  points where  $f$  did better than

the constant predictor. Since  $f$  is better than the constant predictor overall, we must have  $P(A) > 0$ . Now, define  $A^c = \{(z, 1 - y) : (z, y) \in A\}$ . That is, the set constructed by flipping the label for every instance where  $f$  did better. By the overlap assumption,  $P(A^c) > 0$ . By construction,  $f$  is worse than  $c$  on  $A^c$ . Further,  $S = 1_A$  is a random variable that has the causal structure required by a selection variable (it’s a child of  $Y$  and  $Z$  and nothing else). So, the distribution  $Q$  defined by selection on  $S$  is causally compatible with  $P$  and satisfies  $\mathbb{E}_Q[L(f(X_Y^\perp), Y)] > \mathbb{E}_Q[L(c, Y)]$ , as required.

To relax the requirement that  $X = X_Y^\perp$ , just repeat the same argument conditional on each value of  $X_{\frac{1}{2}}$ . To relax the condition that  $Y$  is binary, swap the flipped label  $1 - y$  for any label  $y'$  with worse risk.  $\square$

## B Experimental Details

### B.1 Model

All experiments use BERT as the base predictor. We use `bert_en_uncased_L-12_H-768_A-12` from TensorFlow Hub and do not modify any parameters. Following standard practice, predictions are made using a linear map from the representation layer. We use CrossEntropy loss as the training objective. We train with vanilla stochastic gradient descent, batch size 1024, and learning rate  $1e - 5 \times 1024$ . We use patience 10 early stopping on validation risk. Each model was trained using 2 Tensor Processing Units.

For the MMD regularizer, we use the estimator of Gretton et al. [Gre+12] with the Gaussian RBF kernel. We set kernel bandwidth to 10.0. We compute the MMD on  $(\log f_0(x), \dots, \log f_k(x))$ , where  $f_j(x)$  is the model estimate of  $P(Y = k | x)$ . (Note: this is log, not logit—the later has an extra, irrelevant, degree of freedom). We use log-spaced regularization coefficients between 0 and 128.

### B.2 Data

We don’t do any pre-processing on the MNLI data.

The Amazon review data is from [NLM19].

#### B.2.1 Inducing Dependence Between $Y$ and $Z$ in Amazon Product Reviews

To produce the causal data with  $P(Y = 1 | Z = 1) = P(Y = 0 | Z = 0) = \gamma$

1. Randomly drop reviews with 0 helpful votes  $V$ , until both  $P(V > 0 | Z = 1) > \gamma$  and  $P(V > 0 | Z = 0) > 1 - \gamma$ .
2. Find the smallest  $T_z$  such that  $P(V > T_1 | Z = 1) < \gamma$  and  $P(V > T_0 | Z = 0) < 1 - \gamma$ .
3. Set  $Y = 1[V > T_0]$  for each  $Z = 0$  example and  $Y = 1[V > T_1]$  for each  $Z = 1$  example.
4. Randomly flip  $Y = 0$  to  $Y = 1$  in examples where  $(Z = 0, V = T_0 + 1)$  or  $(Z = 1, V = T_1 + 1)$ , until  $P(Y = 1 | Z = 1) > \gamma$  and  $P(Y = 1 | Z = 0) > 1 - \gamma$ .

After data splitting, we have 58393 training examples, 16221 test examples, and 6489 validation examples.

To produce the anti-causal data with  $P(Y = 1 | Z = 1) = P(Y = 0 | Z = 0) = \gamma$ , choose a random subset with the target association. After data splitting, we have 157616 training examples, 43783 test examples, and 17513 validation examples.

#### B.2.2 Synthetic Counterfactuals in Product Review Data

We select  $10^5$  product reviews from the Amazon “clothing, shoes, and jewelry” dataset, and assign  $Y = 1$  if the review is 4 or 5 stars, and  $Y = 0$  otherwise. For each review, we use only the first twenty tokens of text. We then assign  $Z$  as a Bernoulli random variable with  $P(Z = 1) = \frac{1}{2}$ . When  $Z = 1$ , we replace the tokens “and” and “the” with “andxxxxx” and “thexxxxxx” respectively; for  $Z = 0$  we use the suffix “yyyyy” instead. Counterfactuals can then be produced by swapping the suffixes. To induce a dependency between  $Y$  and  $Z$ , we randomly resample so as to achieve  $\gamma = 0.3$

and  $P(Y = 1) = \frac{1}{2}$ , using the same procedure that was used on the anti-causal model of “natural” product reviews. After selection there are 13,315 training instances and 3,699 test instances.
